# Supplementary material
Source: PubMed Central journal article supplement (PMC2759777)

## Supplementary Materials

**Table 1.** Chemical Shift Differences Between Oxidized and Reduced PRL-1<sup>a</sup>

|     | Wild Type                 |                            | C170S-C171S               |                            | $\Delta\delta$<br>( <sup>1</sup> H) | $\Delta\delta$<br>( <sup>15</sup> N) |      | Wild Type                 |                            | C170S-C171S               |                            | $\Delta\delta$<br>( <sup>1</sup> H) | $\Delta\delta$<br>( <sup>15</sup> N) |
|-----|---------------------------|----------------------------|---------------------------|----------------------------|-------------------------------------|--------------------------------------|------|---------------------------|----------------------------|---------------------------|----------------------------|-------------------------------------|--------------------------------------|
|     | $\delta$ - <sup>1</sup> H | $\delta$ - <sup>15</sup> N | $\delta$ - <sup>1</sup> H | $\delta$ - <sup>15</sup> N |                                     |                                      |      | $\delta$ - <sup>1</sup> H | $\delta$ - <sup>15</sup> N | $\delta$ - <sup>1</sup> H | $\delta$ - <sup>15</sup> N |                                     |                                      |
| M1  |                           |                            |                           |                            | na                                  | na                                   | Y53  | 6.95                      | 115.8                      | 6.89                      | 116.2                      | 0.06                                | -0.4                                 |
| A2  |                           |                            |                           |                            | na                                  | na                                   | D54  | 9.15                      | 123.7                      | 9.11                      | 123.0                      | 0.04                                | 0.7                                  |
| R3  |                           |                            |                           |                            | na                                  | na                                   | T55  | 8.78                      | 115.6                      | 8.40                      | 116.4                      | 0.38                                | -0.8                                 |
| M4  |                           |                            |                           |                            | na                                  | na                                   | T56  | 8.70                      | 120.9                      | 8.54                      | 119.4                      | 0.16                                | 1.5                                  |
| N5  |                           |                            |                           |                            | na                                  | na                                   | L57  | 9.01                      | 120.3                      | 8.36                      | 120.3                      | 0.64                                | 0.0                                  |
| R6  |                           |                            |                           |                            | na                                  | na                                   | V58  | 7.15                      | 117.1                      | 7.02                      | 117.4                      | 0.13                                | -0.3                                 |
| P7  |                           |                            |                           |                            | na                                  | na                                   | E59  | 8.58                      | 119.2                      |                           |                            | na                                  | na                                   |
| A8  | 8.45                      | 126.0                      |                           |                            | na                                  | na                                   | K60  | 8.06                      | 120.5                      | 7.95                      | 119.8                      | 0.12                                | 0.7                                  |
| P9  |                           |                            |                           |                            | na                                  | na                                   | E61  | 7.49                      | 116.6                      | 7.35                      | 116.5                      | 0.14                                | 0.1                                  |
| V10 | 8.52                      | 118.9                      | 8.05                      | 118.2                      | 0.47                                | 0.7                                  | G62  | 8.06                      | 106.7                      | 7.90                      | 106.4                      | 0.16                                | 0.3                                  |
| E11 | 8.90                      | 130.3                      | 8.65                      | 129.7                      | 0.25                                | 0.6                                  | I63  | 7.24                      | 121.6                      | 6.99                      | 121.4                      | 0.25                                | 0.2                                  |
| V12 | 9.29                      | 126.9                      | 9.21                      | 126.9                      | 0.08                                | 0.0                                  | H64  | 7.67                      | 123.5                      | 7.60                      | 123.9                      | 0.07                                | -0.4                                 |
| T13 | 8.75                      | 123.0                      | 8.66                      | 122.2                      | 0.10                                | 0.8                                  | V65  | 8.72                      | 125.1                      | 8.57                      | 125.6                      | 0.15                                | -0.5                                 |
| Y14 | 8.49                      | 124.7                      | 8.26                      | 124.1                      | 0.23                                | 0.6                                  | L66  | 9.21                      | 130.4                      | 8.84                      | 130.7                      | 0.37                                | -0.3                                 |
| K15 | 9.00                      | 125.6                      | 8.85                      | 125.4                      | 0.15                                | 0.2                                  | D67  | 8.46                      | 123.5                      | 8.19                      | 123.8                      | 0.28                                | -0.3                                 |
| N16 | 8.29                      | 119.6                      | 8.19                      | 119.3                      | 0.10                                | 0.3                                  | W68  | 8.22                      | 126.6                      | 8.29                      | 122.9                      | -0.07                               | 3.7                                  |
| M17 | 8.52                      | 119.4                      | 8.32                      | 119.3                      | 0.19                                | 0.1                                  | P69  |                           |                            |                           |                            | na                                  | na                                   |
| R18 | 6.03                      | 122.4                      | 5.92                      | 122.3                      | 0.11                                | 0.1                                  | F70  | 8.41                      | 119.9                      | 7.28                      | 113.9                      | 1.13                                | 6.0                                  |
| F19 | 9.36                      | 121.0                      | 9.19                      | 121.1                      | 0.18                                | -0.1                                 | D71  | 8.26                      | 123.1                      | 8.28                      | 120.1                      | -0.02                               | 3.0                                  |
| L20 | 8.94                      | 124.0                      | 8.56                      | 123.7                      | 0.38                                | 0.3                                  | D72  | 8.49                      | 120.4                      | 8.40                      | 120.2                      | 0.08                                | 0.2                                  |
| I21 | 9.48                      | 127.5                      | 9.17                      | 126.7                      | 0.31                                | 0.8                                  | G73  | 8.69                      | 108.6                      | 7.57                      | 111.2                      | 1.12                                | -2.6                                 |
| T22 | 8.01                      | 120.8                      | 7.81                      | 120.3                      | 0.19                                | 0.5                                  | A74  | 7.72                      | 123.9                      | 7.89                      | 123.4                      | -0.17                               | 0.5                                  |
| H23 | 8.53                      | 119.0                      | 8.24                      | 118.9                      | 0.29                                | 0.1                                  | P75  |                           |                            |                           |                            | na                                  | na                                   |
| N24 | 8.66                      | 120.3                      | 8.00                      | 118.1                      | 0.66                                | 2.2                                  | P76  |                           |                            |                           |                            | na                                  | na                                   |
| P25 |                           |                            |                           |                            | na                                  | na                                   | S77  | 7.77                      | 116.8                      | 8.34                      | 121.6                      | -0.56                               | -4.8                                 |
| T26 |                           |                            | 6.85                      | 104.9                      | na                                  | na                                   | N78  | 8.42                      | 122.3                      | 8.81                      | 119.3                      | -0.40                               | 3.0                                  |
| N27 |                           |                            |                           |                            | na                                  | na                                   | Q79  | 8.21                      | 118.6                      | 8.09                      | 118.6                      | 0.12                                | 0.0                                  |
| A28 |                           |                            | 8.28                      | 126.1                      | na                                  | na                                   | I80  | 7.38                      | 119.2                      | 6.99                      | 118.9                      | 0.40                                | 0.3                                  |
| T29 |                           |                            | 7.44                      | 106.5                      | na                                  | na                                   | V81  | 7.86                      | 119.3                      | 7.65                      | 118.5                      | 0.20                                | 0.8                                  |
| L30 | 7.51                      | 124.6                      | 7.30                      | 124.5                      | 0.21                                | 0.1                                  | D82  | 8.35                      | 119.2                      | 8.04                      | 118.7                      | 0.31                                | 0.5                                  |
| N31 | 8.80                      | 116.2                      | 8.65                      | 116.4                      | 0.15                                | -0.2                                 | D83  | 8.54                      | 122.4                      | 8.16                      | 122.2                      | 0.38                                | 0.2                                  |
| K32 | 7.83                      | 121.1                      | 7.73                      | 120.9                      | 0.11                                | 0.2                                  | W84  | 9.02                      | 124.3                      | 8.99                      | 124.4                      | 0.03                                | -0.1                                 |
| F33 | 8.15                      | 122.8                      | 7.88                      | 122.5                      | 0.27                                | 0.3                                  | L85  | 8.02                      |                            | 8.88                      | 117.4                      | -0.86                               | na                                   |
| I34 | 8.71                      | 118.9                      | 8.67                      | 118.7                      | 0.05                                | 0.2                                  | S86  | 8.34                      | 115.1                      | 7.99                      | 114.6                      | 0.35                                | 0.5                                  |
| E35 | 7.79                      | 118.4                      | 7.64                      | 118.5                      | 0.15                                | -0.1                                 | L87  | 8.07                      | 123.7                      | 7.89                      | 123.3                      | 0.18                                | 0.4                                  |
| E36 | 7.98                      | 121.0                      |                           |                            | na                                  | na                                   | V88  | 8.21                      | 117.0                      | 8.14                      | 117.1                      | 0.07                                | -0.1                                 |
| L37 | 8.26                      | 118.0                      | 7.94                      | 117.6                      | 0.32                                | 0.4                                  | K89  | 7.80                      | 117.5                      | 7.59                      | 117.1                      | 0.21                                | 0.4                                  |
| K38 | 8.24                      | 122.2                      | 8.35                      | 117.9                      | -0.11                               | 4.3                                  | I90  | 8.03                      | 116.6                      | 7.74                      | 116.2                      | 0.29                                | 0.4                                  |
| K39 | 7.98                      | 122.2                      | 7.80                      | 121.9                      | 0.19                                | 0.3                                  | K91  | 8.92                      | 120.1                      | 8.85                      | 120.1                      | 0.07                                | 0.0                                  |
| Y40 | 7.54                      | 114.6                      | 7.35                      | 114.7                      | 0.19                                | -0.1                                 | F92  | 7.24                      | 111.5                      | 7.07                      | 111.2                      | 0.17                                | 0.3                                  |
| G41 | 8.07                      | 109.7                      | 7.90                      | 109.0                      | 0.17                                | 0.7                                  | R93  | 7.41                      | 118.4                      | 7.20                      | 118.2                      | 0.21                                | 0.2                                  |
| V42 | 8.03                      | 120.4                      | 7.68                      | 120.4                      | 0.35                                | 0.0                                  | E94  | 8.64                      | 117.5                      | 8.41                      | 117.3                      | 0.22                                | 0.2                                  |
| T43 | 7.95                      | 112.4                      | 7.94                      | 113.0                      | 0.02                                | -0.6                                 | E95  | 8.11                      | 119.5                      | 8.02                      | 119.3                      | 0.10                                | 0.2                                  |
| T44 | 7.53                      | 120.3                      | 7.45                      | 120.5                      | 0.08                                | -0.2                                 | P96  |                           |                            |                           |                            | na                                  | na                                   |
| I45 | 9.45                      | 127.1                      | 9.29                      | 125.9                      | 0.16                                | 1.2                                  | G97  | 9.16                      | 112.4                      | 8.99                      | 112.2                      | 0.16                                | 0.2                                  |
| V46 | 9.33                      | 127.3                      | 9.04                      | 127.7                      | 0.29                                | -0.4                                 | C98  | 8.24                      | 117.6                      | 8.05                      | 117.4                      | 0.19                                | 0.2                                  |
| R47 | 9.05                      | 126.8                      | 8.92                      | 129.2                      | 0.13                                | -2.4                                 | C99  | 7.39                      | 117.2                      | 7.22                      | 117.1                      | 0.18                                | 0.1                                  |
| V48 | 7.66                      | 112.8                      | 7.48                      | 116.1                      | 0.19                                | -3.3                                 | I100 | 8.39                      | 128.3                      | 8.31                      | 128.1                      | 0.08                                | 0.2                                  |
| C49 | 8.18                      | 121.7                      | 6.94                      | 112.1                      | 1.24                                | 9.6                                  | A101 | 9.28                      | 129.8                      | 8.82                      | 129.2                      | 0.46                                | 0.6                                  |
| E50 | 8.57                      | 127.4                      | 8.94                      | 119.2                      | -0.37                               | 8.2                                  | V102 | 9.06                      | 118.5                      | 9.11                      | 120.5                      | -0.05                               | -2.0                                 |
| A51 | 8.56                      | 127.4                      | 8.27                      | 126.1                      | 0.29                                | 1.3                                  | H103 | 8.31                      | 116.9                      | 8.56                      | 120.2                      | -0.24                               | -3.3                                 |
| T52 | 8.88                      | 112.8                      |                           |                            | na                                  | na                                   | C104 | 8.54                      | 121.9                      | 8.33                      | 122.9                      | 0.21                                | -1.0                                 |



## Figure Legends

**Figure 1.** 2 mg/mL PRL-1-WT was incubated with increasing concentrations of reduced glutathione (GSH) and run on SDS-PAGE as describe above. Although, only 10-50 mM GSH is shown here, concentrations spanning 0.1-200 mM GSH were tested. The migration pattern of PRL-1-WT in the presence of greater than 50 mM GSH was identical to that of the 50 mM data point. All samples for both panels contained 50 mM sodium phosphate buffer and 100 mM NaCl at pH 7.5.

**Figure 2.** *Mass spectra of PRL-1 fragments from a tryptic digest after LC/MS separation.* The column on the left contains data corresponding to the mass series for the C49-containing peptide and the right shows the disulfide bound C49-C104 containing peptides. WT PRL-1 is shown in row **A** and PRL-1-C170S-C171S in row **B**. Some spectra are expanded vertically and the expansion factor is indicated with an arrow in each panel.

**Figure 3.** The spectrum of the oxidized form of PRL-1-C98A (red) is overlaid with reduced PRL-1-C98A (black). Reduction was accomplished by the addition of 10 mM DTT. A significant conformational change is observed in PRL-1 upon reduction, where greater than 90% of the peaks move. The C49 resonance moves significantly up-field upon addition of DTT and can be used as a diagnostic to assess whether the protein is oxidized or reduced. The C49 residue in both oxidized (red) and reduced (black) spectra are highlighted in boxes.

Figures

Figure 1

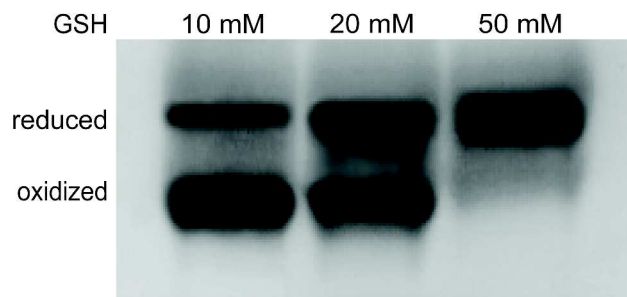

Figure 2

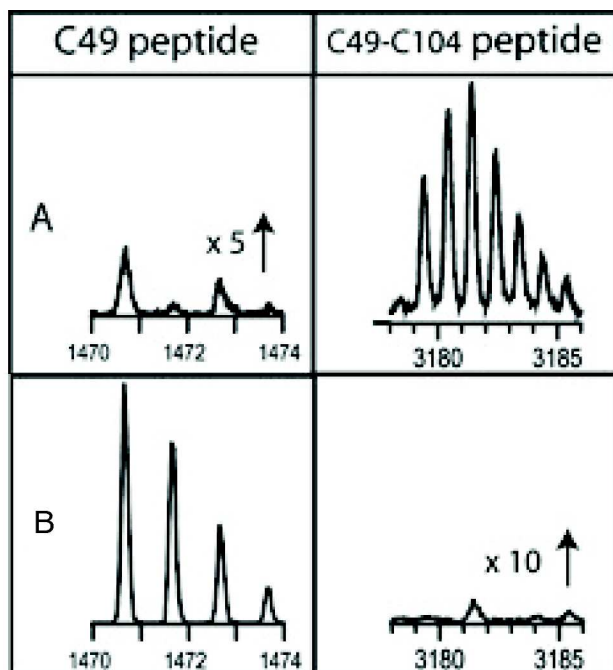

Figure 3

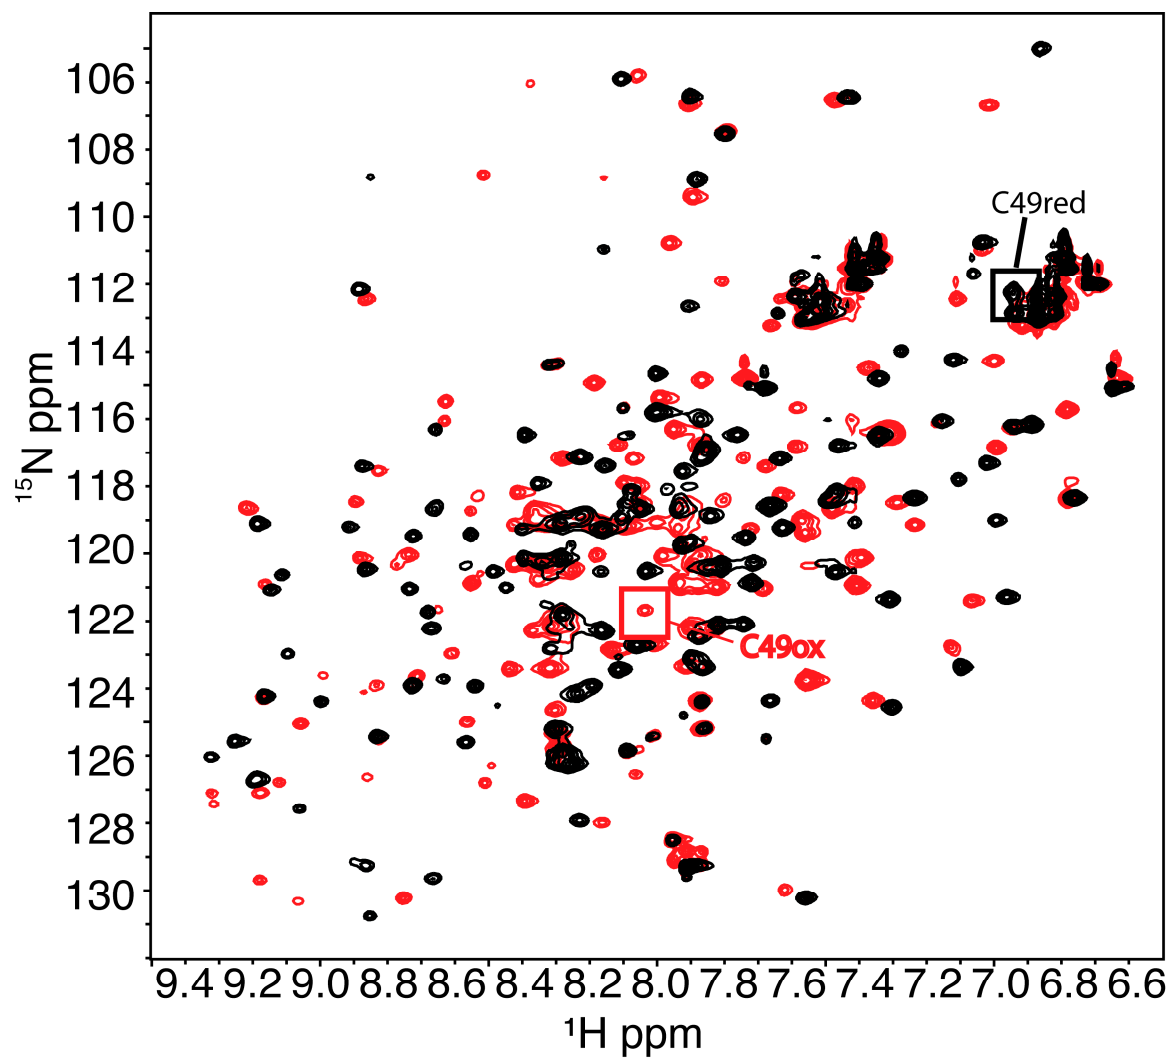

Supplement: NIHMS112048-supplement-1_si_001.pdf [file NIHMS112048-supplement-1_si_001.pdf]
